# Supplementary material
Source: PubMed Central journal article supplement (PMC3435156)
Supplement: 1205278109_pnas.201205278SI.pdf [file 1205278109_pnas.201205278SI.pdf]

# Supporting Information

Shi et al. 10.1073/pnas.1205278109

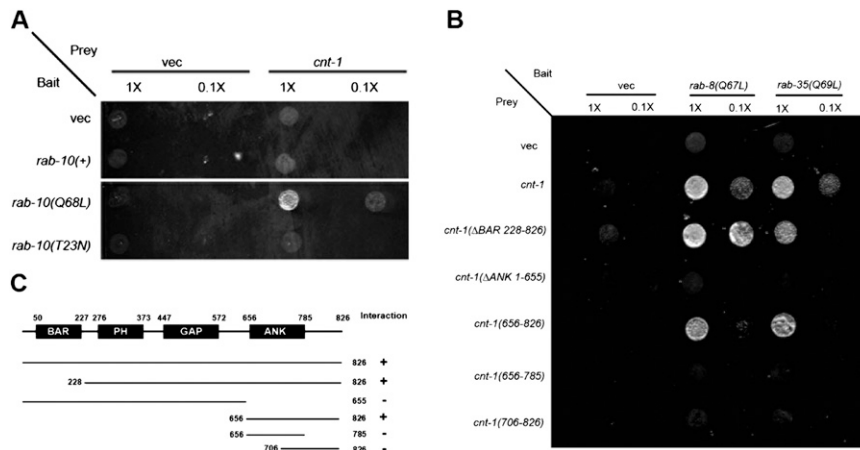

**Fig. S1.** (A) CNT-1 interacts preferentially with the GTP-bound active form of RAB-10. RAB-10, RAB-10(Q68L), and RAB-10(T23N) were expressed in a yeast reporter strain as a fusion with the DNA-binding domain of LexA (bait). CNT-1 truncated forms were expressed in the same yeast cells as fusions with the B42 transcriptional activation domain (prey). Interaction between bait and prey was assayed by complementation of leucine auxotrophy (LEU2 growth assay). Colonies were diluted in liquid and spotted on solid growth medium directly or after further 0.1× dilutions. (B) CNT-1 interacts physically with RAB-8(Q67L) and RAB-35(Q69L), and the interaction between CNT-1 and RAB-8(Q67L) and RAB-35(Q69L) requires the CNT-1 segment containing the C-terminal ANK repeat. RAB-8(Q67L) and RAB-35(Q69L) were expressed as bait, and CNT-1 truncated forms were expressed as prey. (C) Schematic representations of CNT-1 domains and the truncated fragments used in the yeast two-hybrid analysis. Protein domains [ankyrin repeat domain (ANK), bin-amphiphysin-rysin domain (BAR), GTPase-activating protein domain (GAP), and pleckstrin homology domain (PH)] are shown as dark boxes above the protein sequences (shown as dark lines) used in the study. Amino acid numbers are indicated.







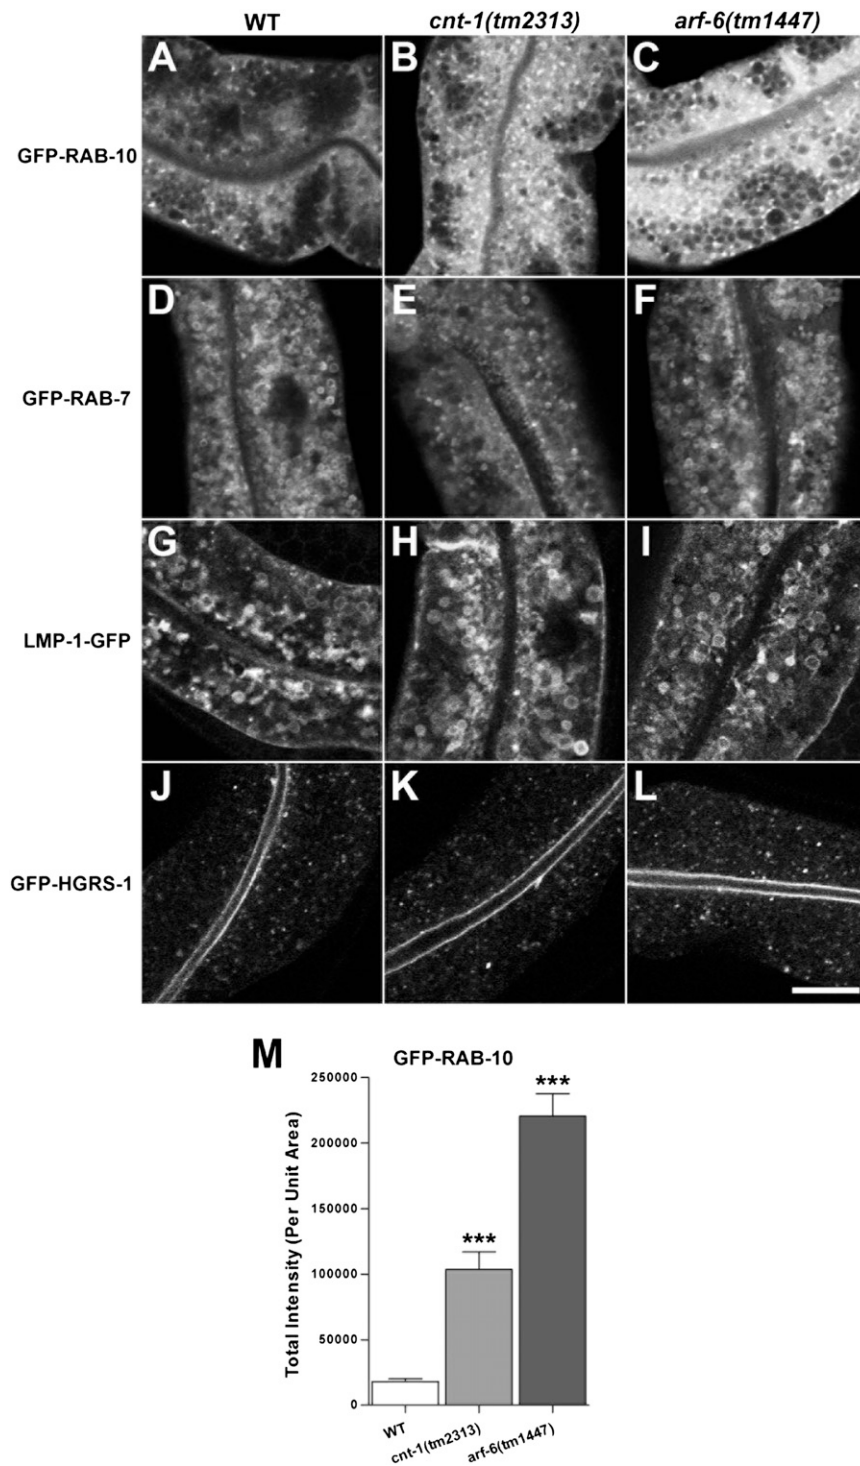

**Fig. S5.** (A–C) GFP-RAB-10-labeling of endosomes increases in *cnt-1*- and *arf-6*-mutant intestinal cells. (D–F) GFP-RAB-7-labeled late endosomes were not altered detectably in *cnt-1*- and *arf-6*-mutant intestinal cells. (G–I) LMP-1-GFP-labeled late endosomes were not affected in *cnt-1*- and *arf-6*-mutant intestinal cells. (J–L) The multivesicular endosome/multivesicular body marker HGRS-1/Hrs appears normal in *cnt-1* and *arf-6* mutants. (Scale bar: 10  $\mu$ m.) (M) Quantification of total intensity per unit area of GFP-labeled puncta. Error bars indicate SEM.  $n = 18$ ; three different regions of each intestine (defined by a  $100 \times 100$  pixel box positioned at random) were sampled in six animals of each genotype. \*\*\* $P < 0.001$  one-tailed Student's  $t$  test.





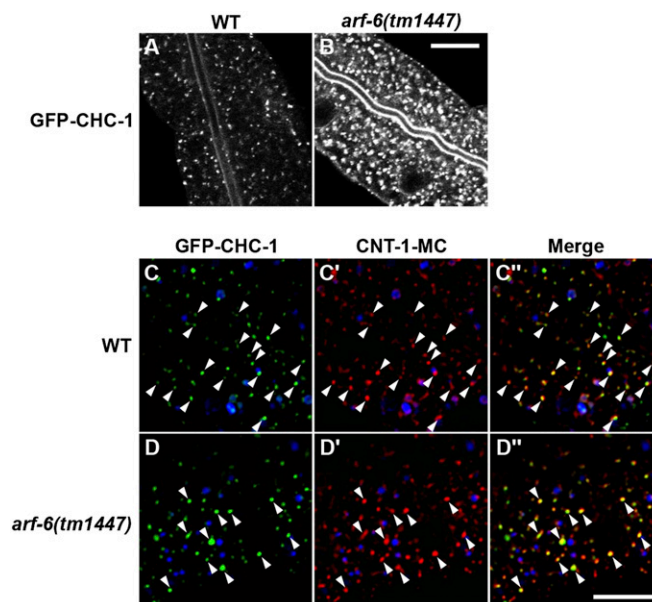

**Fig. S8.** Clathrin accumulates and overlaps with CNT-1 on enlarged endosomes in *arf-6* mutants. (A and B) Representative confocal images are shown for GFP-tagged clathrin heavy chain (GFP-CHC-1) in wild-type animals and *arf-6(tm1447)* mutants. (Scale bar: 10  $\mu$ m.) (C–D'') Colocalization images of CHC-1 and CNT-1 in wild-type and *arf-6*–mutant backgrounds are from deconvolved 3D image stacks acquired in intact living animals expressing GFP- and mCherry-tagged proteins specifically in intestinal epithelial cells. (C–C'') CNT-1-MC colocalizes with GFP-CHC-1 in wild-type animals. Arrowheads indicate representative endosomes labeled by both CNT-1-MC and GFP-CHC-1. (D–D'') CNT-1-MC colocalizes with GFP-CHC-1 on enlarged endosomal structures in *arf-6* mutants. Arrowheads indicate enlarged puncta labeled by both CNT-1-MC and GFP-CHC-1. In each image autofluorescent lysosome-like organelles can be seen in all three channels with the strongest signal in blue. (Scale bar: 10  $\mu$ m.)

**Table S1. Transgenic and mutant strains used in this study**

*pwls724[pvha6::CNT-1::GFP]*  
*pwls728[pvha6::CNT-1::mCherry]*  
*pwls601[pvha6::ARF-6::GFP]*  
*pwls206[pvha6::GFP::RAB-10]* (1)  
*pwls72[pvha6::GFP::RAB-5]* (1)  
*pwls87[pvha6::GFP::RME-1]* (1)  
*pwls524[pvha6::GFP::ALX-1]* (2)  
*pwls481[pvha6::MANS::GFP]* (1)  
*pwls112[pvha6::hTAC::GFP]* (1)  
*pwls90[pvha6::hTfR::GFP]* (1)  
*pwls722[pvha6::SDPN-1::GFP]* (3)  
*pwls170[pvha6::GFP::RAB-7]* (1)  
*pwls50[pmp-1::LMP-1::GFP]* (4)  
*pwls518[pvha6::GFP::HGRS-1]* (2)  
*pwls446[pvha6::PH::GFP]*  
*pwls140[pvha6::GFP::2xFYVE]*  
*pwls890[pvha6::Akt-PH::GFP]*  
*dkls8 [pvha6::GFP::CHC-1]* (5)  
*pwls68[pvha6::GFP::RAB-8]*  
*pwls625[pvha6::ARF-6::mCherry]*  
*rme-1(b1045)* (6)  
*rab-10(q373)* (1)  
*alx-1 (gk275)* (2)  
*rab-10(ok1494)\**  
*arf-6(tm1447)<sup>†</sup>*  
*cnt-1(tm2313)<sup>†</sup>*

\*C. *elegans* Gene Knockout Consortium.

<sup>†</sup>S. Mitani, Japanese National Bioresource Project for the Experimental Animal "Nematode *C. elegans*" (Tokyo).

- Chen CC, et al. (2006) RAB-10 is required for endocytic recycling in the *Caenorhabditis elegans* intestine. *Mol Biol Cell* 17:1286–1297.
- Shi A, et al. (2007) A novel requirement for *C. elegans* Alix/ALX-1 in RME-1-mediated membrane transport. *Curr Biol* 17:1913–1924.
- Pant S, et al. (2009) AMPH-1/Amphiphysin/Bin1 functions with RME-1/Ehd1 in endocytic recycling. *Nat Cell Biol* 11:1399–1410.
- Treusch S, et al. (2004) *Caenorhabditis elegans* functional orthologue of human protein h-mucopolipin-1 is required for lysosome biogenesis. *Proc Natl Acad Sci USA* 101:4483–4488.
- Sato K, et al. (2009) Differential requirements for clathrin in receptor-mediated endocytosis and maintenance of synaptic vesicle pools. *Proc Natl Acad Sci USA* 106:1139–1144.
- Grant B, et al. (2001) Evidence that RME-1, a conserved *C. elegans* EH-domain protein, functions in endocytic recycling. *Nat Cell Biol* 3:573–579.
